# Supplementary material for: Changes in cerebrospinal fluid proteins across the spectrum of untreated and treated chronic HIV-1 infection
Source: PubMed Central journal article supplement (PMC11469498; doi:10.1371/journal.ppat.1012470), 2024-09-24

# Figure S1A. Correlations of quadruplicate CXCL8 measurements.

**20153\***  
**(Cardiometabolic)**  
%>LOD = 100%

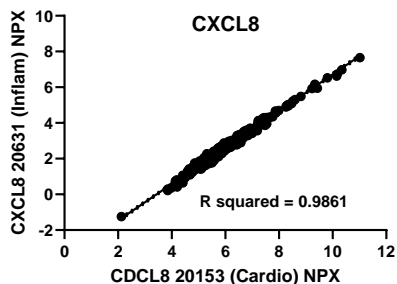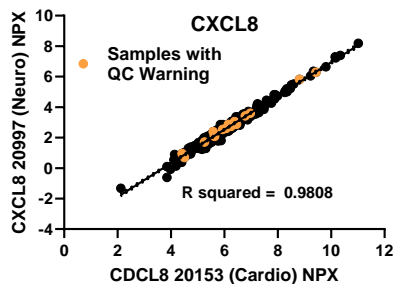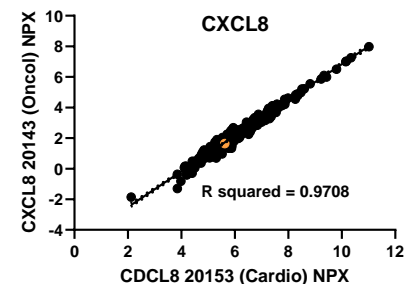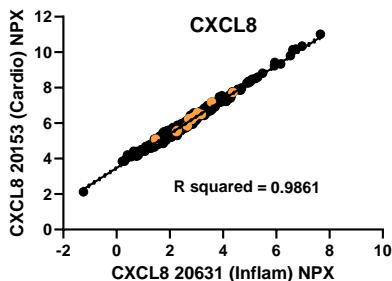

**20631**  
**(Inflammation)**  
%>LOD = 100%

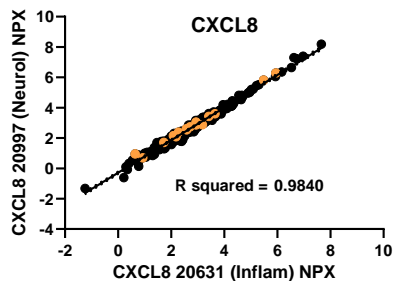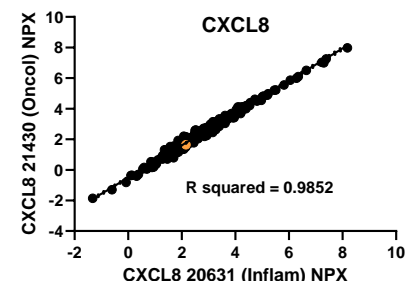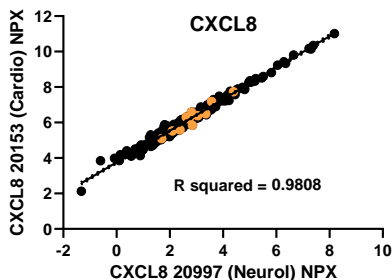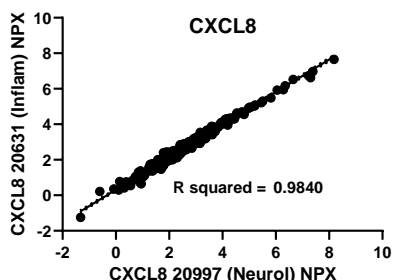

**20997**  
**(Neurology)**  
%>LOD = 100%

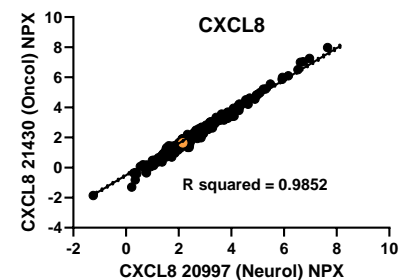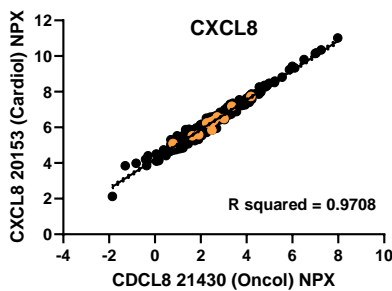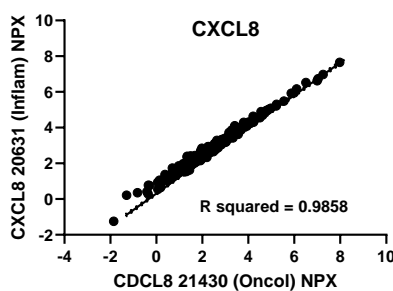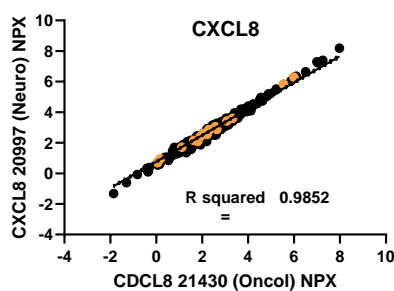

**21430**  
**(Oncology)**  
%>LOD = 100%

# Figure S1B. Correlations of quadruplicate IL6 measurements.

**20101\***  
**(Cardiometabolic)**

%>LOD = 99.1%

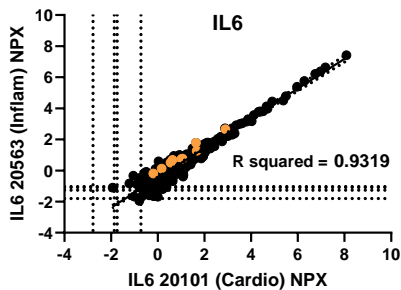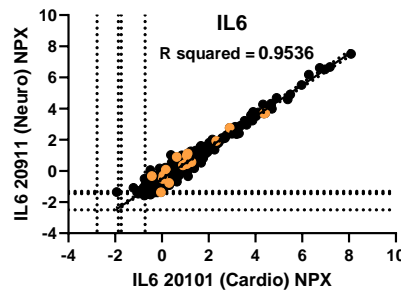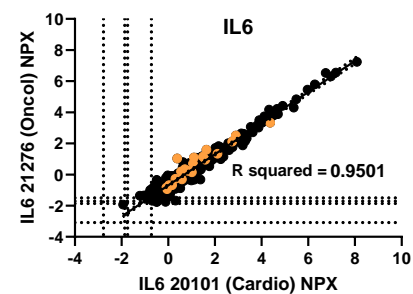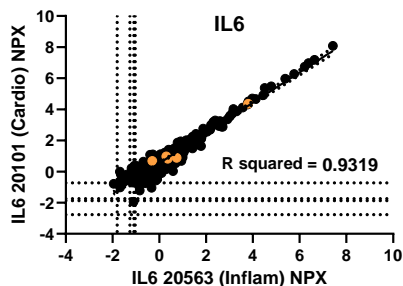

**20563**  
**(Inflammation)**

%>LOD = 94.6%

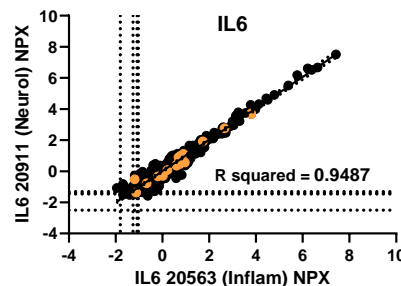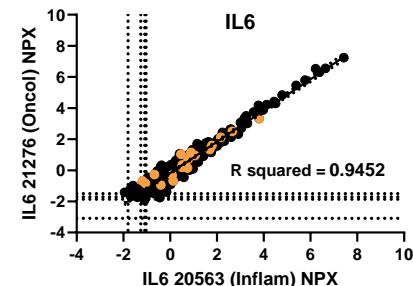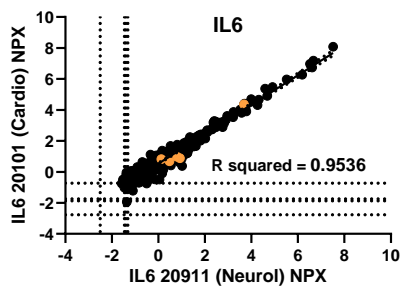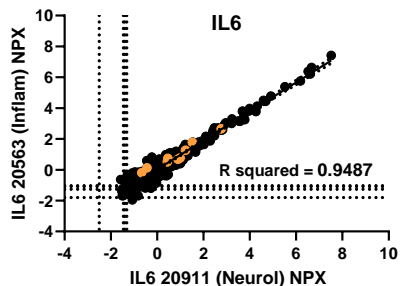

**20911**  
**(Neurology)**

%>LOD = 98.4%

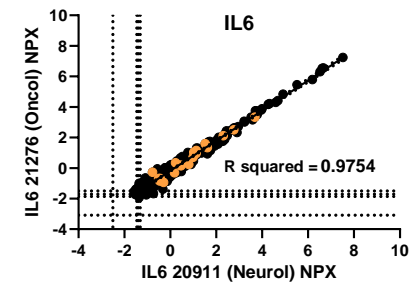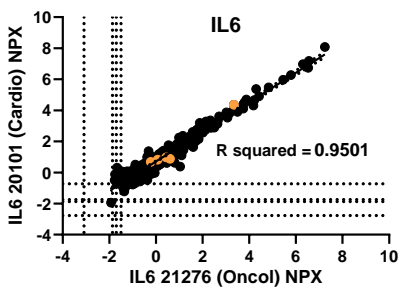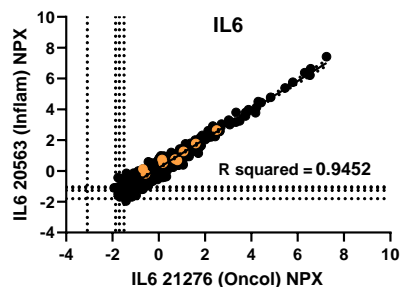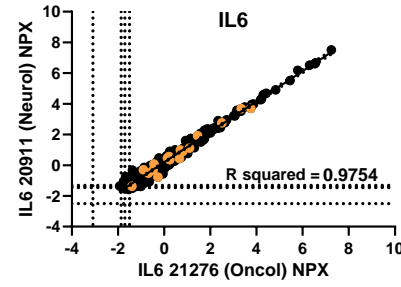

**21276**  
**(Oncology)**

%>LOD = 98.8%

# Figure S1C. Correlations of quadruplicate TNF measurements.

**20074**  
**(Cardiometabolic)**

%>LOD = 45.4%

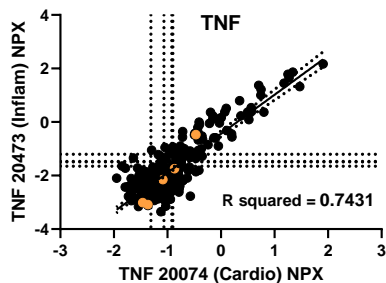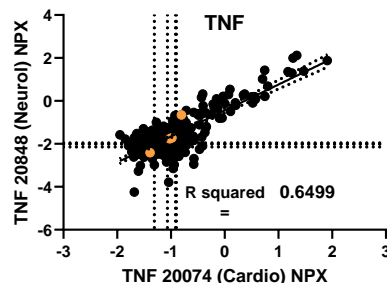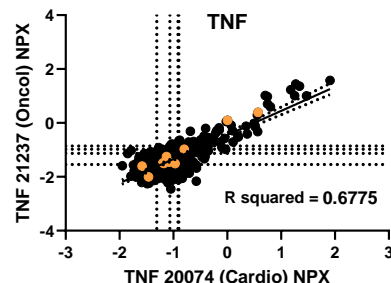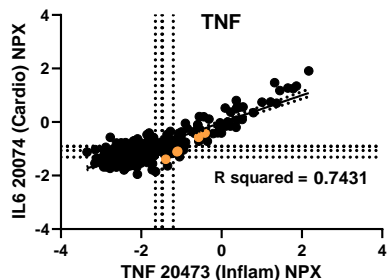

**20473**  
**(Inflammation)**

%>LOD = 25.7%

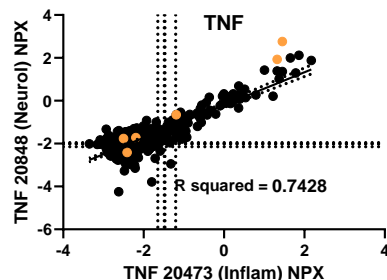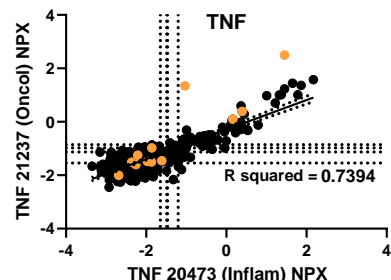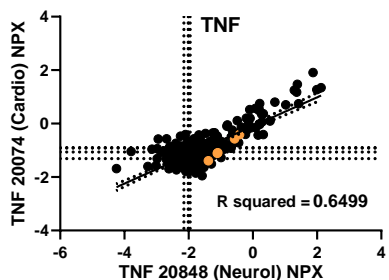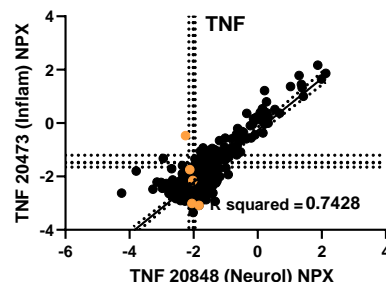

**20848\***  
**(Neurology)**

%>LOD = 69.2%

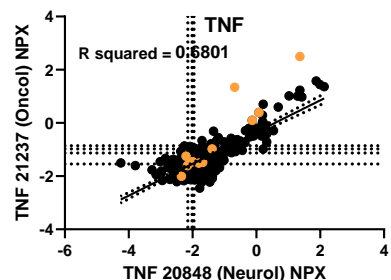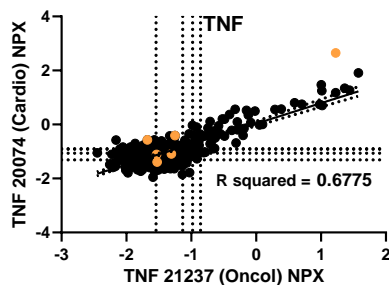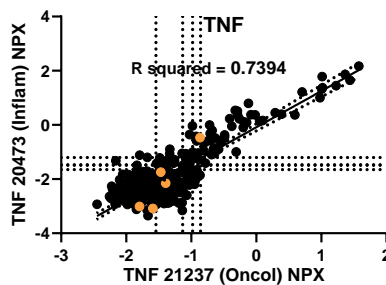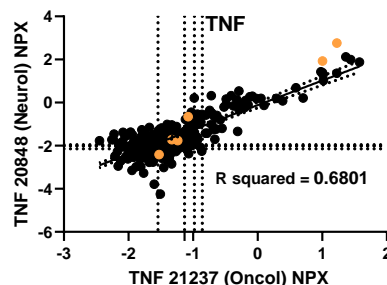

**21237**  
**(Oncology)**

%>LOD = 35.9%

# Figure S1D. Subject group profiles across quadruplicate measurements.

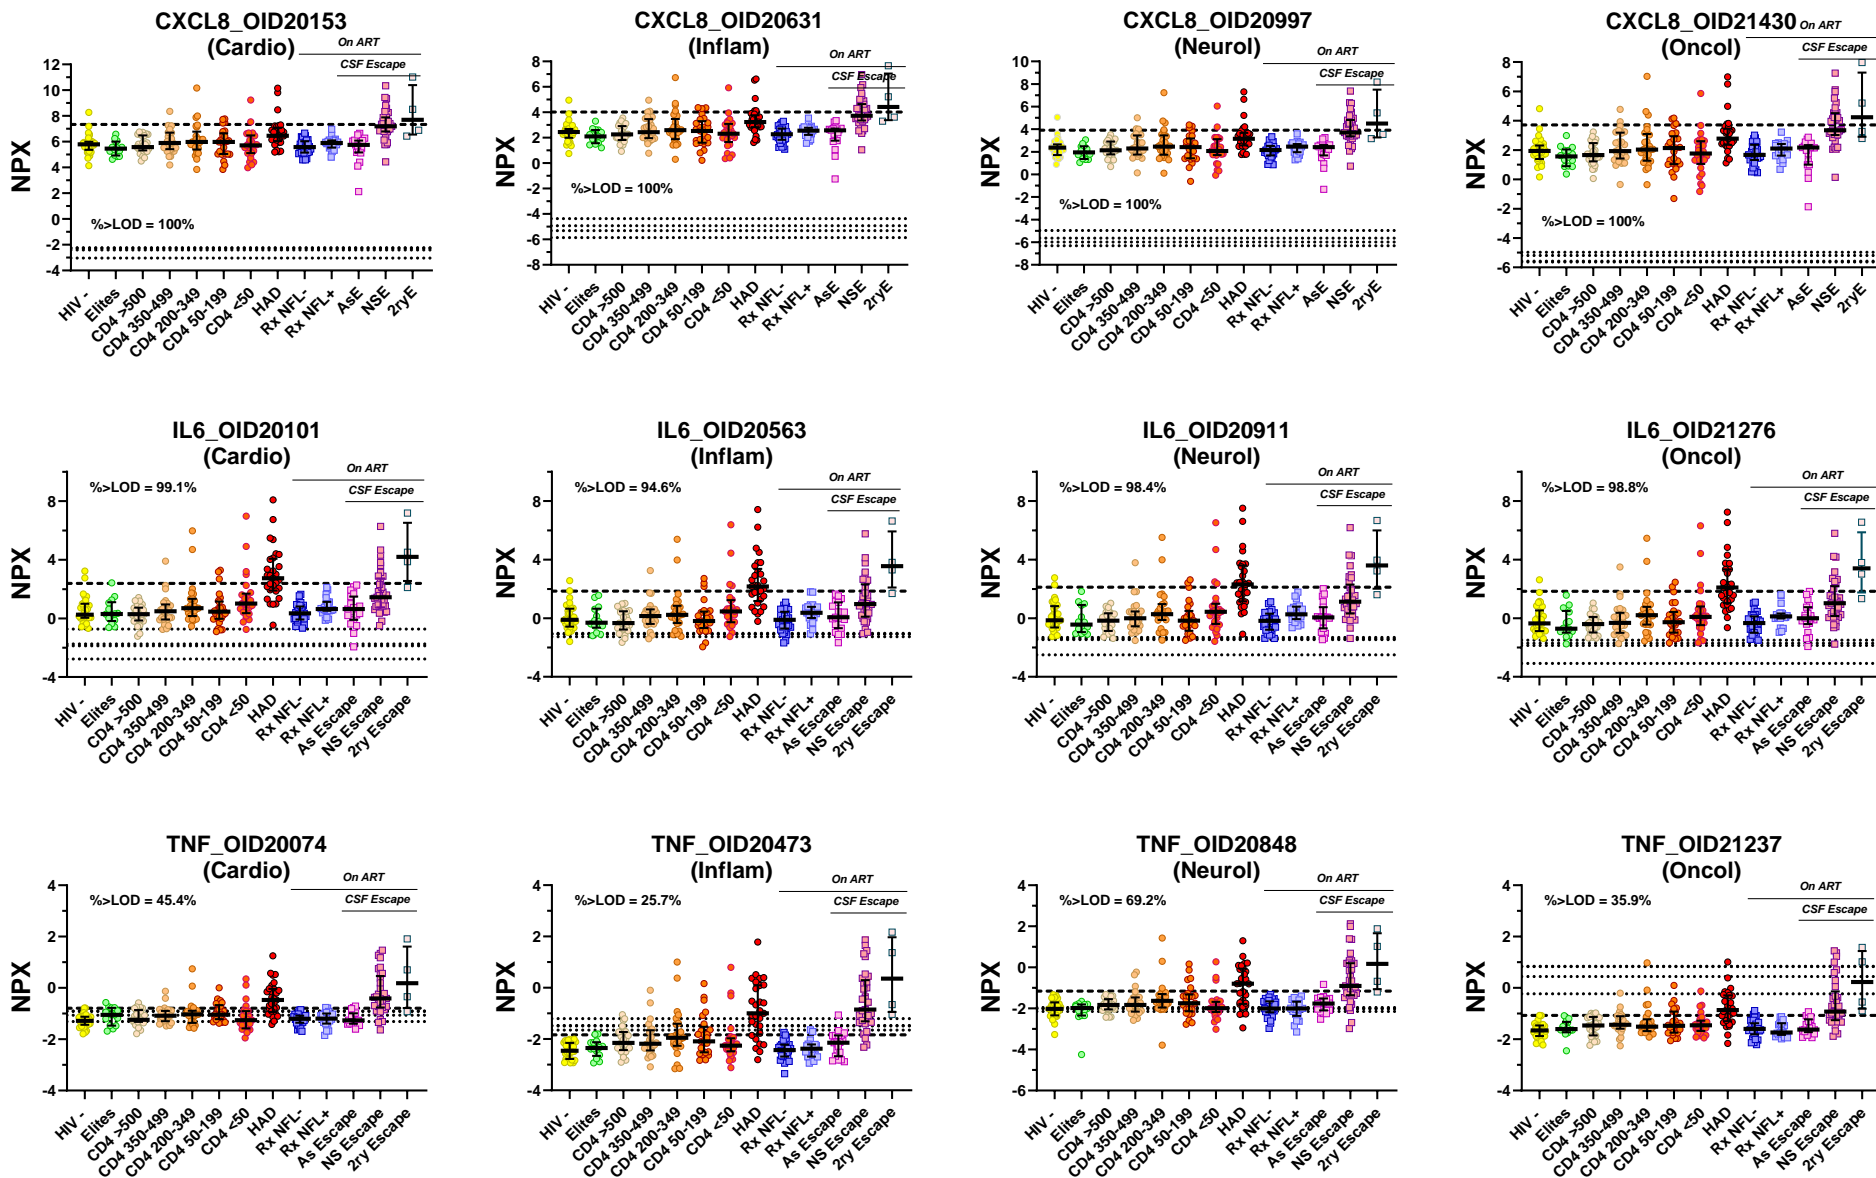

Supplement: ppat.1012470.s003.pdf [file ppat.1012470.s003.pdf]
