# Supplementary material for: Changes in cerebrospinal fluid proteins across the spectrum of untreated and treated chronic HIV-1 infection
Source: PubMed Central journal article supplement (PMC11469498; doi:10.1371/journal.ppat.1012470), 2024-09-24

# Figure S2. CNS Injury markers.

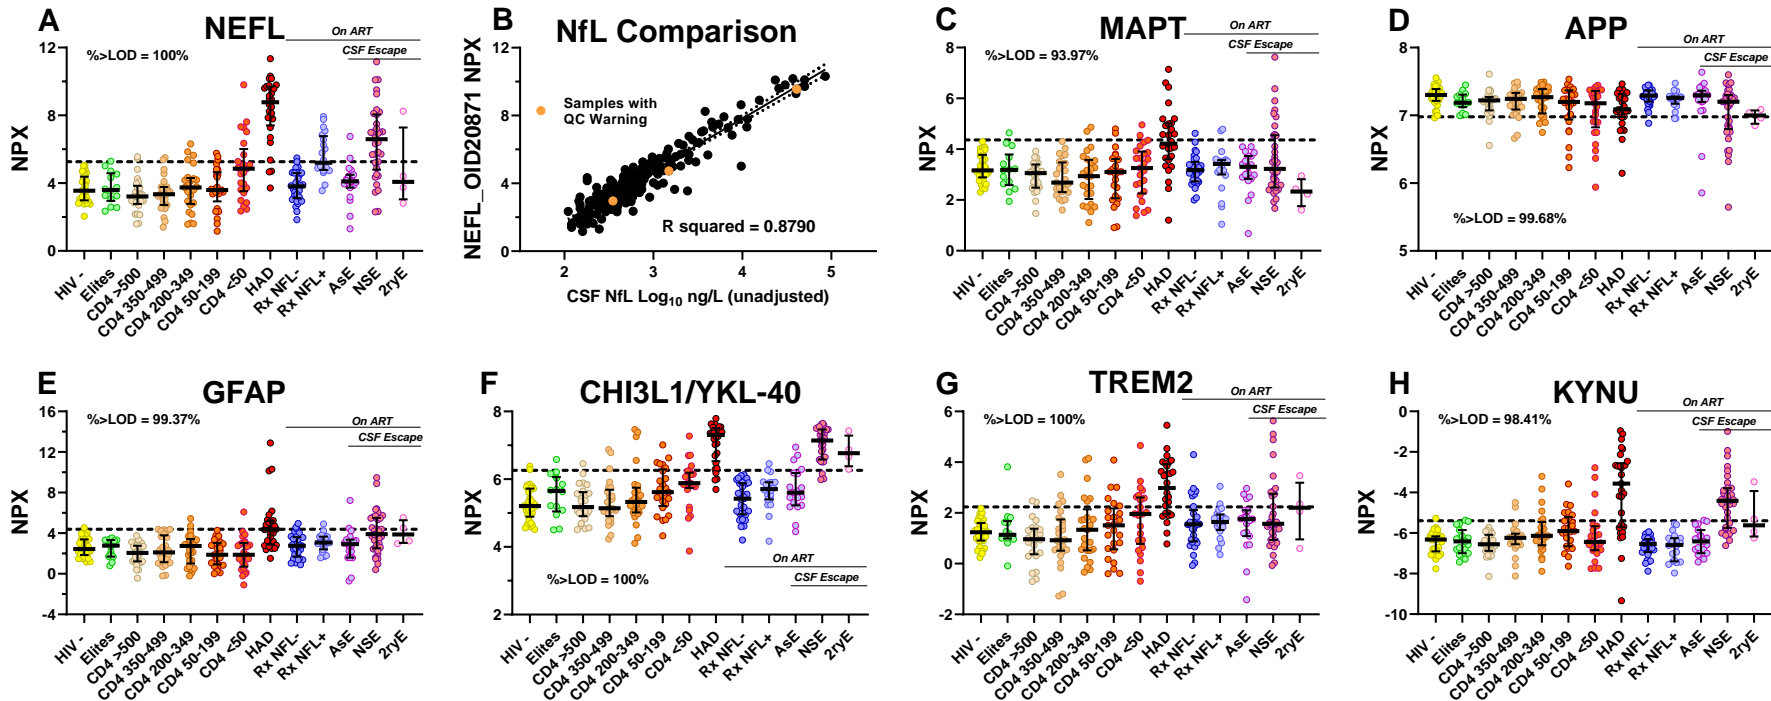

Supplement: ppat.1012470.s004.pdf [file ppat.1012470.s004.pdf]
